# Supplementary material for: Characterization and anti-aging effects ofOpuntia ficus-indica(L.) Miller extracts in ad-galactose-induced skin aging model
Source: Royal Society of Chemistry journal article supplement (doi:10.1039/d2fo03834j), 2023-01-01
Supplement: d2fo03834j1.pdf [file d2fo03834j1.pdf]

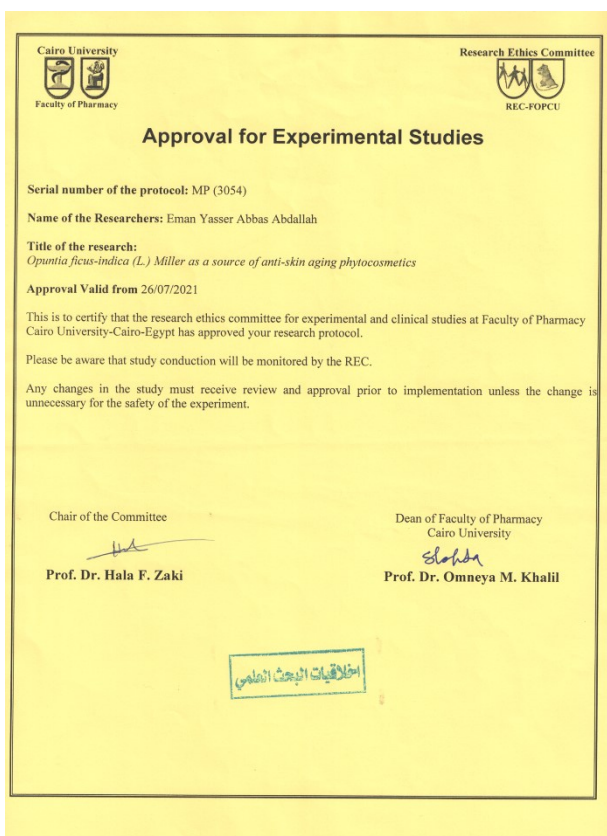

**Fig. S1** Approval document of the D-galactose experimental study.

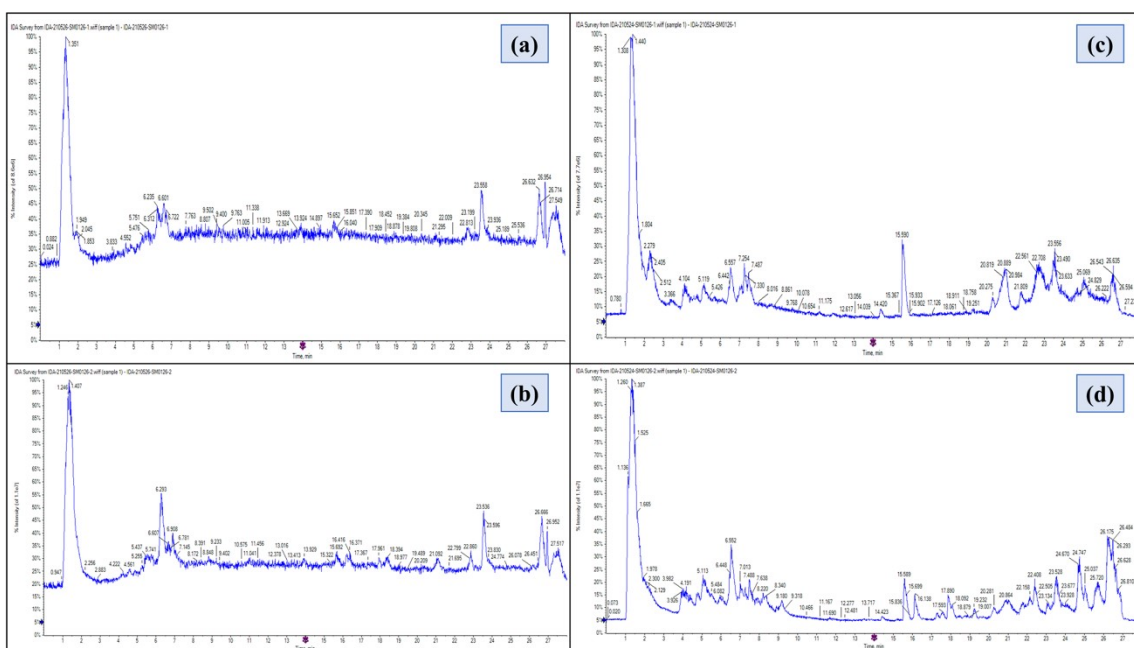

**Fig. S2** Total ion chromatograms of (a) OPE in the negative ionization mode, (b) OCE in the negative ionization mode, (c) OPE in the positive ionization mode and (d) OCE in the positive ionization mode. OPE: OFI fruit peel ethanolic extract; OCE: OFI cladodes' ethanolic extract.
